# Supplementary material for: Regulated Deficit Irrigation Alters Anthocyanins, Tannins and Sensory Properties of Cabernet Sauvignon Grapes and Wines
Source: Molecules. 2015 Apr 29;20(5):7820–44. doi: 10.3390/molecules20057820 (PMC6272144; doi:10.3390/molecules20057820)
Supplement: Supplementary file 1 [file molecules-20-07820-s001.pdf]

## Supplementary Materials

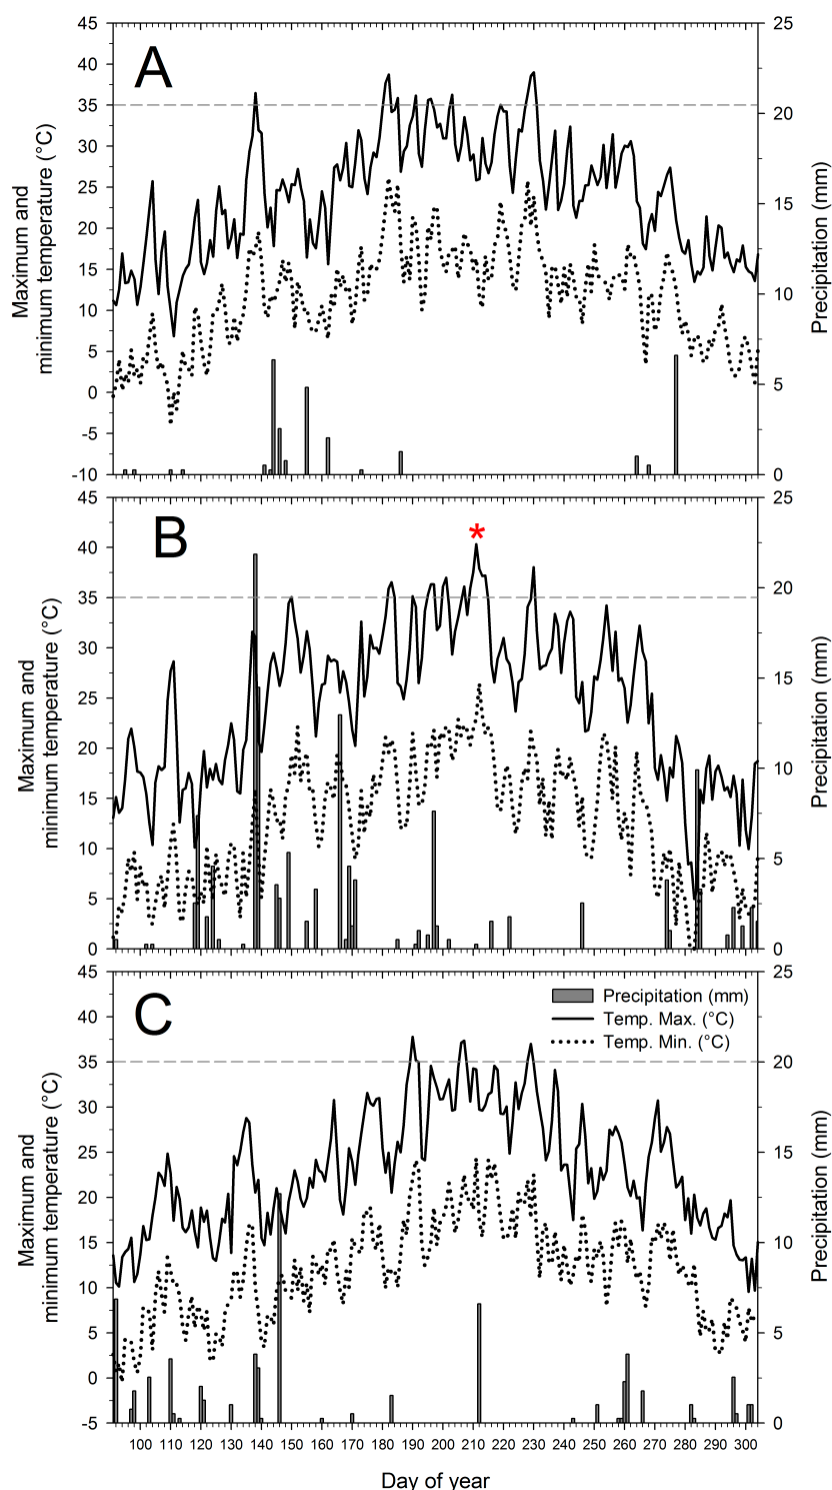

**Figure S1.** Maximum and minimum temperatures and precipitation during three growing season from April 1st (Day 91) to October 31st (Day 304) registered in the vineyard during three growing seasons in field-grown, own-rooted Cabernet Sauvignon grapevines in the Columbia Valley, WA (USA). (A) 2008 season; (B) 2009 season; (C) 2010 season. The grey dotted line indicates 35 °C. The red asterisk indicates one episode of 40.3 °C in 2009.

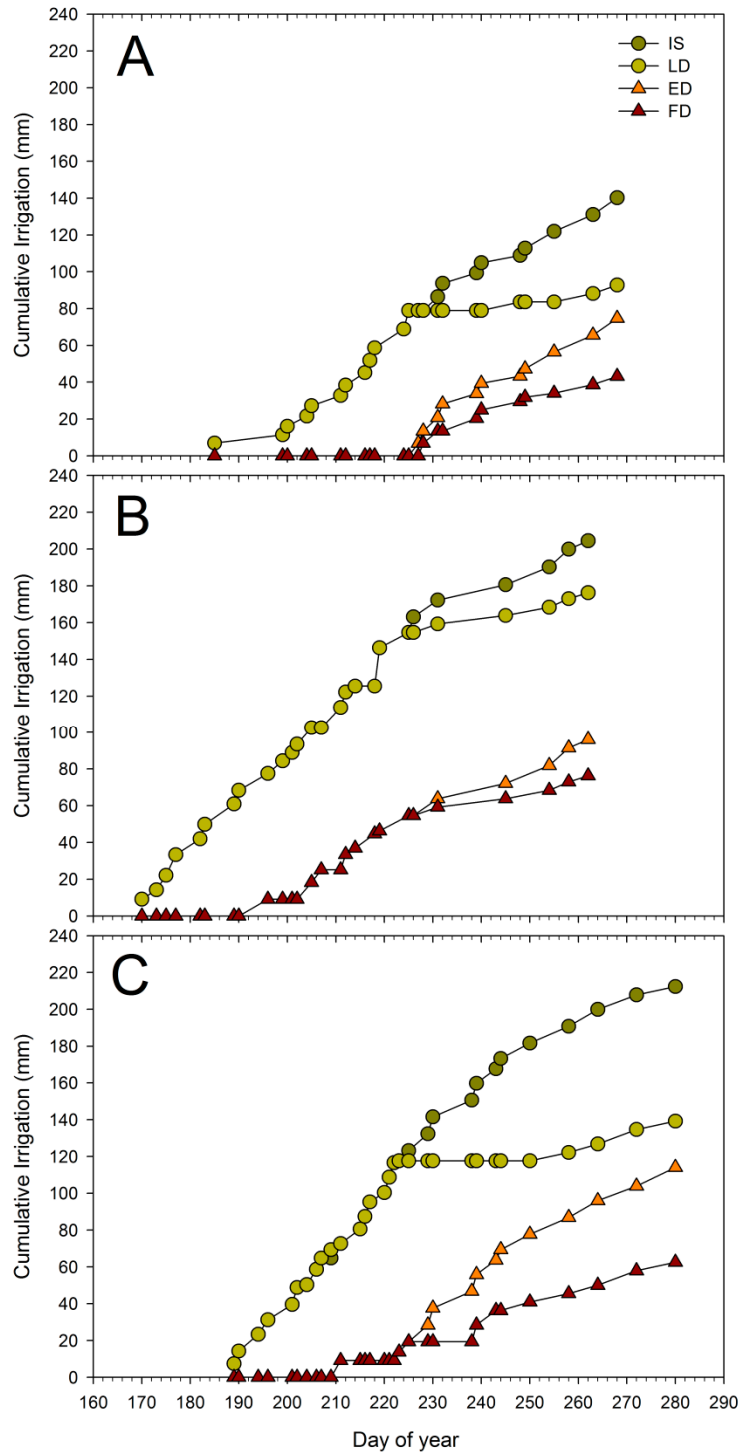

**Figure S2.** Cumulative irrigation applied during three growing seasons in field-grown, own-rooted Cabernet Sauvignon grapevines in the Columbia Valley, WA (USA). (A) 2008 season; (B) 2009 season; (C) 2010 season. IS: industry standard; ED: early deficit (fruit set to véraison); LD: late deficit (véraison to harvest); FD: full season deficit (fruit set to harvest).

**Table S1.** Degrees of freedom and F-ratios from a two-way ANOVA of trained panel evaluation of four wines.

| Source of variation | Degree of freedoms | Wine Atributes          |              |              |              |              |              |              |
|---------------------|--------------------|-------------------------|--------------|--------------|--------------|--------------|--------------|--------------|
|                     |                    | Roughness               | Dryness      | Harshness    | Saturation   | Brown Hue    | Purple Hue   | Red Hue      |
| Panelist            | 8                  | <b>2.37<sup>a</sup></b> | 0.64         | 0.66         | <b>3.84</b>  | <b>11.32</b> | 2.01         | <b>11.29</b> |
| Wine                | 3                  | <b>10.19</b>            | <b>11.03</b> | <b>14.19</b> | <b>80.48</b> | <b>7.64</b>  | <b>19.42</b> | <b>17.89</b> |
| Panelist × Wine     | 24                 | 1.02                    | 0.74         | 0.80         | 1.23         | 1.24         | 0.43         | 1.06         |

<sup>a</sup> Significant values (Fisher's LSD test,  $p < 0.05$ ) are shown in bold underlined letters.
